1  
2  
3  
4  
5  
6  
7  
8  
9  
10  
11  
12  
13  
14  
15  
16  
17  
18

Specialized neurons in the right habenula mediate  
response to aversive olfactory cues

Jung-Hwa Choi<sup>1,3</sup>, Erik Duboué<sup>2</sup>, Michelle Macurak<sup>1</sup>, Jean-Michael Chanchu<sup>1</sup> and Marnie E. Halpern<sup>1,3, \*</sup>

1. Carnegie Institution for Science, Department of Embryology, Baltimore, Maryland, 21218, USA
2. Jupiter Life Science Initiative, Florida Atlantic University, Jupiter, FL 33458, USA; Wilkes Honors College, Florida Atlantic University, Jupiter, FL 33458, USA
3. Current address: Geisel School of Medicine at Dartmouth, Department of Molecular and Systems Biology, 725 Renssen, Hanover, NH 03755, USA

\*Author for correspondence [Marnie.E.Halpern@dartmouth.edu](mailto:Marnie.E.Halpern@dartmouth.edu)

19 **Abstract**

20 Hemispheric specializations are well studied at the functional level but less is known about the  
21 underlying neural mechanisms. We identified a small cluster of cholinergic neurons in the right  
22 dorsal habenula (dHb) of zebrafish, defined by their expression of the *lecithin retinol*  
23 *acyltransferase domain containing 2a (lratd2a)* gene and their efferent connections with a  
24 subregion of the ventral interpeduncular nucleus (vIPN). The unilateral *lratd2a*-expressing  
25 neurons are innervated by a subset of mitral cells from both the left and right olfactory bulb and  
26 are activated upon exposure of adult zebrafish to the aversive odorant cadaverine that provokes  
27 avoidance behavior. Using an intersectional strategy to drive expression of the botulinum  
28 neurotoxin specifically in these neurons, we find that adults no longer show protracted avoidance  
29 to cadaverine. Mutants with left-isomerized dHb that lack these neurons are less repelled by  
30 cadaverine and their behavioral response to alarm substance, a potent aversive cue, is diminished.  
31 However mutants in which both dHb have right identity appear more reactive to alarm substance.  
32 The results implicate an asymmetric dHb-vIPN neural circuit in processing of aversive olfactory  
33 cues and modulating resultant behavioral responses.

34

35

36

## 37 **Introduction**

38 Fish use the sense of smell to search for food, detect danger, navigate and communicate social  
39 information by detecting chemical cues in their aquatic environment (Yoshihara, 2014). As with  
40 birds and mammals, perception of olfactory cues is lateralized and influences behavior  
41 (Siniscalchi, 2017). In zebrafish, nine glomerular clusters in the olfactory bulb (OB) receive  
42 olfactory information from sensory neurons in the olfactory epithelium and, in turn, transmit  
43 signals to four forebrain regions: the posterior zone of the dorsal telencephalon (Dp), the ventral  
44 nucleus of the ventral telencephalon (Vv), the posterior tuberculum (PT), and the dorsal habenular  
45 region (dHb) (Miyasaka et al., 2014; Yoshihara, 2014). In contrast to all other target regions that  
46 are located on both sides of the forebrain, only the right nucleus of the dHb is innervated by mitral  
47 cells that emanate from medio-dorsal (mdG) and ventro-medial (vmG) glomerular clusters in both  
48 OBs (Miyasaka *et al.*, 2014; Yoshihara, 2014). Moreover, calcium imaging experiments suggest  
49 that the right dHb shows a preferential response to odorants compared to the left dHb (Chen et al.,  
50 2019; Dreosti et al., 2014; Jeti et al., 2014; Krishnan et al., 2014). The identity of the post-synaptic  
51 neurons within the right dHb that receive olfactory input and the purpose of this asymmetric  
52 connection are unknown.

53 The habenulae are highly conserved structures in the vertebrate brain and, in teleosts such  
54 as zebrafish, consist of dorsal and ventral (vHb) nuclei, which are equivalent to the medial and  
55 lateral habenulae of mammals, respectively (Amo et al., 2010). The neurons of the dHb are largely  
56 glutamatergic and contain specialized subpopulations that also produce acetylcholine, substance P  
57 or somatostatin. In zebrafish, the number of neurons within each subtype differs between the left  
58 and right dHb (deCarvalho et al., 2014; Hsu et al., 2016). The dHb have been implicated in diverse  
59 states such as reward, fear, anxiety, sleep and addiction (Duboué et al., 2017; Hikosaka, 2010;

60 Okamoto et al., 2012). Accordingly, the right dHb was shown to respond to bile acid and involved  
61 in food-seeking behaviors (Chen *et al.*, 2019; Krishnan *et al.*, 2014), whereas the left dHb was  
62 found to be activated by light and attenuate fear responses (Dreosti *et al.*, 2014; Facchin et al.,  
63 2015; Zhang et al., 2017). However, the properties of the dHb neurons implicated in these  
64 behaviors, such as their neurotransmitter identity and precise connectivity with their unpaired  
65 target, the midbrain interpeduncular nucleus (IPN), have yet to be determined.

66 Here, we describe a group of cholinergic neurons defined by their expression of the *lecithin*  
67 *retinol acyltransferase domain containing 2a* (*lratd2a*) gene [formerly known as *family with*  
68 *sequence similarity 84 member B* (*fam84b*)], that are located in the right dHb where they are  
69 selectively innervated by the olfactory mitral cells that originate from both sides of the brain  
70 (Miyasaka et al., 2009), and form efferent connections with a restricted subregion of the ventral  
71 IPN (vIPN). Activity of the *lratd2a*-expressing neurons is increased following exposure to the  
72 aversive odorant cadaverine and their inactivation alters the avoidance behavior of adult zebrafish  
73 to this repulsive cue. Our findings provide further evidence for functional specialization of the left  
74 and right habenular nuclei and reveal the neuronal pathway that mediates a lateralized olfactory  
75 response.

76

## 77 **Materials and Methods**

78

79 Zebrafish

80 Zebrafish were maintained at 27 °C in a 14:10 h light/dark cycle in a recirculating system with

81 dechlorinated water (system water). The AB wild-type strain (Walker, 1998), transgenic lines

82 *Tg(Iratd2a:QF2)<sup>c601</sup>*, *Tg(slc5a7a:Cre)<sup>c662</sup>*, *Tg(Xla.Tubb2:QF2;he1.1:mCherry)<sup>c663</sup>*,

83 *Tg(QUAS:GCaMP6f)<sup>c587</sup>*, *Tg(QUAS:BoTxBLC-GFP)<sup>c605</sup>*, *Tg(QUAS:mApple-*

84 *CAAX;he1.1:mCherry)<sup>c636</sup>*, *Tg(QUAS:loxP-mCherry-loxP-GFP-CAAX)<sup>c679</sup>*, and *Tg(QUAS:loxP-*

85 *mCherry-loxP-BoTxBLC-GFP)<sup>c674</sup>*, *Tg(-10lhx2a:gap-EYFP)<sup>zf177</sup>* (formally known as

86 *Tg(lhx2a:gap-YFP)*) (Miyasaka *et al.*, 2009), and mutant strains *tcf712<sup>zf55</sup>* (Muncan *et al.*, 2007)

87 and *bsx<sup>m1376</sup>* (Schredelseker and Driever, 2018) were used. For imaging, embryos and larvae were

88 transferred to system water containing 0.003% phenylthiourea (PTU) to inhibit melanin

89 pigmentation. All zebrafish protocols were approved by the Institutional Animal Care and Use

90 Committee (IACUC) of the Carnegie Institution for Science or Dartmouth College.

91

92 Generation of transgenic lines by *Tol2* transgenesis

93 The MultiSite Gateway-based construction kit (Kwan *et al.*, 2007) was used to create transgenic

94 constructs for *Tol2* transposition. A 16 bp *QUAS* sequence (Potter *et al.*, 2010), was cloned into

95 the 5' entry vector (*pDONRP4-PIR*, #219 of *Tol2kit* v1.2) via a BP reaction (11789020, Thermo

96 Fisher Scientific). Middle entry vectors (*pDONR221*, #218 of *Tol2kit* v1.2 (Kwan *et al.*, 2007))

97 were generated for *QF2*, *mApple-CAAX*, *loxP-mCherry-stop-loxP*, *GCaMP6f* and *BoTxBLC-GFP*.

98 Sequences corresponding to the *SV40 poly A* tail, the *SV40 poly A* tail followed by a secondary

99 marker consisting of the zebrafish *hatching enzyme 1* promoter (Xie *et al.*, 2012) driving mCherry,

100 or to *BoTxBLC-GFP* (Lal et al., 2018; Sternberg et al., 2016; Zhang *et al.*, 2017) were cloned into  
101 the 3' entry vector (*pDONRP2R-P3*, #220 of Tol2kit v1.2 (Kwan *et al.*, 2007)). Final constructs  
102 were created using an LR reaction (11791020, Thermo Fisher Scientific) into a Tol2 destination  
103 vector (*pDestTol2pA2*, #394 of the Tol2kit v1.2 (Kwan *et al.*, 2007)) (Supplementary table 1).

104 To produce Tol2 transposase mRNA, *pCS-zT2TP* was digested by *NotI* and RNA  
105 synthesized using the mMACHINE SP6 Transcription Kit (AM1340, Thermo Fisher  
106 Scientific). RNA was purified by phenol/chloroform-isoamyl extraction, followed by chloroform  
107 extraction and isopropanol precipitation (Suster et al., 2011). A solution containing *QF2/QUAS*  
108 plasmid DNA (~25 ng/μl), transposase mRNA (~25 ng/μl) and phenol red (0.5%) was  
109 microinjected into one-cell stage zebrafish embryos, which were raised to adulthood. To identify  
110 transgenic founders, F<sub>0</sub> adult fish were outcrossed to AB and embryos were assessed for the  
111 presence of the secondary marker by screening for mCherry labeling of hatching gland cells after  
112 24 hpf and raised to adulthood.

113

#### 114 Generation of transgenic lines by genome editing

115 For generating transgenic lines at targeted sites, we performed CRISPR/Cas9-mediated genome  
116 editing using the method of Kimura *et al.* (Kimura et al., 2014), which relies on homology-  
117 independent repair of double-strand breaks for integration of donor DNA. To construct the donor  
118 DNA, we combined GFP bait sequences (Gbait) and the hsp70 promoter fragment (Kimura *et al.*,  
119 2014), with a QF2 sequence, which contains the DNA binding and transcriptional activation  
120 domains of the QF transcription factor of *Neurospora crassa* (Ghosh and Halpern, 2016; Subedi  
121 et al., 2014). The Gbait-hsp70 sequence was amplified with forward 5'-  
122 GGCGAGGGCGATGCCACCTACGG-3' and reverse 5'-

123 CCGCGGCAAGAACTGCAATAAAAAAAAAAC-3' primers, using Gbait-hsp70:Gal4 donor  
124 DNA (Kimura *et al.*, 2014). QF2 sequence was amplified with forward 5'-  
125 ACTAGTATGCCACCCAAGCGCAAAACGC-3' and reverse 5'-  
126 CTGCAGCAACTATGTATAATAAAGTTGAAA-3' primers, using pDEST:QF2 template DNA  
127 Subsequently, the Gbait-hsp70 fragment and QF2 fragment were independently inserted into  
128 pGEM T-easy (A1360, Promega) and subsequently combined into one vector by *Sac*II digestion  
129 and ligation (Addgene, plasmid #122563). The Cre sequence was amplified using pCR8GW-Cre-  
130 pA-FRT-kan-FRT as template DNA (Suster *et al.*, 2011) and (forward  
131 5'-ACTAGTGCCACCATGGCCAATTTACTG-3', and reverse  
132 5'-CTGCAGGGACAAACCACAAGTAGA-3') primers, and inserted into pGEM T-easy. The  
133 Gbait-hsp70 fragment was subcloned into the Cre vector by *Sac*II digestion and ligation (Addgene,  
134 plasmid #122562).

135 Production of sgRNAs and Cas9 RNA was performed as described previously (Hwang *et*  
136 *al.*, 2013; Jao *et al.*, 2013). Potential sgRNAs were designed using Zifit (Sander *et al.*, 2010). Pairs  
137 of synthetic oligonucleotides (*Iratd2a* sense, 5'-TAGGACTGGACACCGAAGAAGA-3'; *Iratd2a*  
138 anti-sense, 5'-AAACTCTTCTTCGGTGTCCAGT-3'; *slc5a7a* sense,  
139 5'-TAGGCTCTTTGTGCACTGTTGG-3'; *slc5a7a* anti-sense,  
140 5'-AAACCAACAGTGCACAAAGAG-3'), 5'-TAGG-N<sub>18</sub>-3' and 5'-AAAC-N<sub>18</sub>-3', were  
141 annealed and inserted at the *Bsa*I site of the pDR274 vector (Addgene, plasmid #42250). To make  
142 sgRNA and Cas9 mRNA, template DNA for sgRNAs and pT3TS nCas9n (Addgene, plasmid  
143 #46757) were digested by *Dra*I and *Xba*I, respectively. The MAXIscript T7 Transcription Kit  
144 (AM1312, Thermo Fisher Scientific) was used for synthesis of sgRNAs from linearized DNA  
145 template and the mMESSAGE mMACHINE T3 Transcription Kit (AM1348, Thermo Fisher

146 Scientific) for synthesis of Cas9 RNA. RNA was purified by phenol/chloroform and precipitated  
147 by isopropanol.

148 A solution containing sgRNA for the targeted gene (~50 ng/μl), sgRNA (~50 ng/μl) to  
149 linearize donor plasmids at the Gbait site (Auer et al., 2014; Kimura *et al.*, 2014), the Gbait-hsp70-  
150 QF2-pA and Gbait-hsp70-Cre-pA (~50 ng/μl) plasmids, Cas9 mRNA (~500 ng/μl), and phenol  
151 red (0.5%) was microinjected into one-cell stage embryos. To verify integration of donor DNA at  
152 the target locus, PCR was performed using primers that correspond to sequences flanking the  
153 integration site and within the donor plasmid (*hsp70* reverse, 5'-TCAAGTCGCTTCTCTTCGGT-  
154 3'). (For *lratd2a*, the forward primer is 5'-CTGCTGAAGTGGCATTATGGGC-3' and the  
155 reverse primer is 5'-CCTGGAAGTCCCCGACATAC-3'; for *slc5a7a* the forward primer is 5'-  
156 CACATCTCTCTGACGTCCATC-3' and the reverse is 5'-GTTGCTGCGCAGGACTTAAAA-  
157 3'). Sequence analysis of PCR products confirmed integration at the targeted sites.

158

159 RNA *in situ* hybridization

160 Whole-mount *in situ* hybridization was performed as previously described (deCarvalho *et al.*,  
161 2014; Gamse et al., 2002). In brief, larvae and dissected brains were fixed in 4% paraformaldehyde  
162 (P6148, Sigma-Aldrich) in 1X PBS (phosphate-buffered saline) at 4 °C overnight. To synthesize  
163 RNA probes, the following restriction enzymes and RNA polymerases were used: *lratd2a*  
164 (*Bam*HI/T7), *fos* (*Not*I/SP6), *slc5a7a* (*Not*I/SP6), *kctd12.1* (*Eco*RI/T7) (deCarvalho et al., 2013;  
165 Hong et al., 2013). Probes were labeled with UTP-digoxigenin (11093274910, Roche) and samples  
166 incubated at 70 °C in hybridization solution containing 50% formamide. Hybridized probes were  
167 detected using alkaline phosphatase-conjugated antibodies (Anti-Digoxigenin-AP,  
168 #11093274910, and Anti-Fluorescein-AP, #11426338910, Sigma-Aldrich) and visualized by



169 staining with 4-nitro blue tetrazolium (NBT, #11383213001, Roche), 5-bromo-4-chloro-3-indolyl-  
170 phosphate (BCIP, #11383221001, Roche) and 2-(4-Iodophenyl)-3-(4-nitrophenyl)-5-  
171 phenyltetrazolium Chloride (INT, #I00671G, Fisher Scientific).

172

### 173 Preparation of odorants

174 Alarm substance was freshly prepared on the day of testing. Adult zebrafish (6 female and 6 male)  
175 were anesthetized in 0.02% tricaine (E10521, Ethyl 3-aminobenzoate methanesulfonate; Sigma-  
176 Aldrich). Shallow lesions were made on the skin (10 on each side) using a fresh razor blade and  
177 single fish were consecutively immersed in a beaker containing distilled water (25 ml for *fos*  
178 experiment and 50 ml for behavioral analyses) for 30 seconds at 4 °C. The solution was filtered  
179 using a 0.2 µm filter (565-0020, ThermoFisher Scientific) and stored at 4 °C until used (Mathuru  
180 et al., 2012). The cadaverine (#33211, final concentration 100 µM) and chondroitin sulfate  
181 (#c4384, 100 µg/ml) were purchased from Sigma-Aldrich, and stock solutions prepared in distilled  
182 water.

183

### 184 Calcium imaging in larval and juvenile zebrafish

185 Calcium imaging was performed on 7, 14 and 21-22 dpf *Tg(lratd2a:QF2)<sup>c644</sup>*;  
186 *Tg(QUAS:GCaMP6f)<sup>c587</sup>* individuals. Larvae and juveniles were paralyzed by immersion in  $\alpha$ -  
187 bungarotoxin (20 µl of 1 mg/ml solution in system water, B1601, ThermoFisher Scientific)  
188 (Duboué *et al.*, 2017; Severi *et al.*, 2014) followed by washing in fresh system water. Individual  
189 fish were embedded in 2% low melting agarose in a petri dish (60 mm) with a custom-designed  
190 mold. After solidification, the agarose around the nose was carefully removed with forceps for  
191 access to odorants, and the individual immersed in fresh system water. The dish was placed under

192 a 25X (NA = 0.95), on a Leica SP5 (for chondroitin sulfate) or under a 20X (NA=0.5) water  
193 immersion objective on a Zeiss LSM 980 (for cadaverine) confocal microscope. Images were  
194 acquired in *XYZT* acquisition mode at 512 X 200 pixel resolution at a rate of 2 Hz and digitized 8  
195 bit from two focal planes. To calculate fluorescence intensity, regions of interest (ROI) were  
196 manually drawn around each cell in the average focal plane with the polygon tool and ROI *manage*  
197 in Fiji (Schindelin et al., 2012). To normalize calcium activity for each cell to baseline fluorescence  
198 (average of 250 frames from each neuron), the fractional change in fluorescence ( $\Delta F/F$ ) was  
199 calculated before the application of odorants, according to the formula  $F = (F_i - F_0)/F_0$ , where  $F_i$  is  
200 the fluorescence intensity at a single time point and  $F_0$  is the baseline fluorescence. All data and  
201 images were analyzed using custom programs in MATLAB (MathWorks, version 7.3) and Excel  
202 software.

203

#### 204 Assay of *fos* expression in adult zebrafish

205 Individual adult zebrafish (7–9 months old) were placed in a tank with 1 L system water and  
206 acclimated for at least 1 hour prior to odorant exposure. Each odorant solution (1 ml) was gently  
207 pipetted into the tank water and the fish was kept there as the odorant diffused. After 30 min, the  
208 fish was sacrificed in an ice water slurry, and the brain dissected out and fixed in 4%  
209 paraformaldehyde in 1X PBS overnight at 4 °C. Fixed brains were embedded in 4% low melting  
210 agarose (SeaPlaque® Agarose, Lonza) in 1X PBS and sectioned at 50  $\mu$ m (for juvenile brains) or  
211 70  $\mu$ m (for adult brains) using a vibratome (VT1000S, Leica Biosystems, Inc.). For more precise  
212 counting of *fos* expressing cells in adult brains, habenular sections were 35  $\mu$ m thick. Sections  
213 were covered in 50% glycerol in 1X PBS under coverslips. Bright-field images were captured with  
214 a Zeiss AxioCam HRc camera mounted on a Zeiss Axioskop. A Leica SP5 confocal microscope

215 was used for fluorescent images. Data from *fos* RNA *in situ* hybridization experiments were  
216 quantified using ImageJ/Fiji software (Schindelin *et al.*, 2012).

217

## 218 Behavioral assays

219 Behavioral assays were performed using 5 – 7 week old juvenile zebrafish and adults between 4  
220 and 8 months of age. Responses to odorants were measured between 10:00 a.m. and 4:00 p.m. and  
221 fish were starved for 1 day prior to testing (Koide *et al.*, 2009). Individual adults were placed in a  
222 1.5 L test tank (Aquatic Habitats) in 1 L of system water and allowed to acclimate for at least 1  
223 hour. For experiments with juveniles, individuals were acclimated to the behavior room for 1 hour,  
224 gently netted into the test tank (20 x 9 x 8.3 cm, 1.5 L mating cage) with 0.6 L system water and  
225 maintained there for 5 min prior to testing. Swimming activity was recorded for 5 min (4 min for  
226 juveniles) before and after the application of odorants. Odorants (2 ml for adults, 1 ml for juveniles)  
227 were slowly expelled through plastic tubing (Tygon R-3606; 0.8 mm ID, 2.4 mm OD) attached on  
228 one end to a 3 ml syringe (BD 309657) and on the other positioned at one end of the test tank.  
229 Preference indices were calculated using the formula: preference to odorants = (Total time spent  
230 in the tank half where odorant was delivered) – (Total time spent in the other half of the tank)/Total  
231 time (Koide *et al.*, 2009; Wakisaka *et al.*, 2017).

232

## 233 Quantification and statistical analyses

234 Analyses were performed using custom written scripts in MATLAB (The MathWorks). Mann  
235 Whitney *U* and Student's *t* tests were used to compare nonparametric unmatched groups. One-  
236 sample *t* test against 0 was used for analyzing the preference to cadaverine. The significance was

237 two-tailed for all tests and depicted as n.s. (non-significant,  $P > 0.05$ ) or with significance as

238 \* $P < 0.05$ , \*\* $P < 0.01$ , \*\*\* $P < 0.001$ , and \*\*\*\* $P < 0.0001$ .

239

## 240 **Results**

### 241 ***lratd2a*-expressing neurons in the right dHb receive bilateral olfactory input**

242 A subset of medio-dorsal mitral cells that are labeled by *Tg(lhx2a:gap-YFP)* were previously  
243 shown to project their axons bilaterally through the telencephalon and terminate in the right dHb  
244 (Miyasaka *et al.*, 2009), in the vicinity of a small population of *lratd2a*-expressing neurons  
245 [(deCarvalho *et al.*, 2013) and Figure 1A]. To characterize this subset of right dHb neurons, we  
246 used CRISPR/Cas9-mediated targeted integration (Kimura *et al.*, 2014) to introduce the QF2  
247 transcription factor (Ghosh and Halpern, 2016; Subedi *et al.*, 2014) under the control of *lratd2a*  
248 regulatory sequences (Figure 1B). QF2 does not disrupt transcription at the *lratd2a* locus  
249 (Supplementary figure 1) and drives expression of QUAS regulated fluorescent reporter genes in  
250 a similar pattern as endogenous gene expression in the nervous system (deCarvalho *et al.*, 2013).  
251 In 4 dpf larval zebrafish, this includes a subset of neurons in the OB, the bilateral vHb, and a small  
252 cluster of neurons in the right dHb (Figures 1C-E’). Double labeling confirms that the axons of  
253 *lhx2a* olfactory neurons terminate precisely at the *lratd2a*-expressing right habenular neurons  
254 (Figures 1C-D’), which project to a restricted region of the ventral IPN (Figures 1F-G’).

255

### 256 **Aversive olfactory cues activate *lratd2a* neurons in the right dHb**

257 Several studies using transgenic expression of the genetically encoded calcium indicator GCaMP  
258 have demonstrated that dHb neurons respond to olfactory cues in larval zebrafish (Jetti *et al.*, 2014;  
259 Krishnan *et al.*, 2014). To determine whether olfactants activate the *lratd2a* positive neuronal  
260 cluster in the right dHb, we analyzed calcium signaling in *Tg(lratd2a:QF2)<sup>c644</sup>*,  
261 *Tg(QUAS:GCaMP6f)<sup>c587</sup>* larval and juvenile zebrafish. Following exposure of 7, 14 and 21 dpf  
262 individuals to cadaverine (Figures 2A-B, Supplementary figures 2 and 3), a known aversive

263 olfactory cue that is released from decaying fish (Hussain et al., 2013), we measured a two-fold  
264 increase in activity compared to that after application of water alone. The *lratd2a* dHb neurons  
265 also responded to chondroitin sulfate, a component of alarm substance (also known as  
266 Schreckstoff), which is released from the skin of injured fish (Mathuru *et al.*, 2012). A two-fold  
267 increase in calcium signals was detected after the first and second delivery of chondroitin sulfate  
268 to 22 dpf larvae and a four-fold increase after the second application to 7 and 14 dpf larvae (Figures  
269 2A-B, Supplementary figures 2 and 3).

270 To examine whether the response to aversive odorants persists in the olfactory-dHb  
271 pathway of adult zebrafish, we used expression of the *fos* gene as an indicator of neuronal  
272 activation (deCarvalho *et al.*, 2013; Hong *et al.*, 2013). Consistent with previous findings (Dieris  
273 et al., 2017), cadaverine broadly activated OB mitral neurons in the dorsal glomerulus (dG), dorso-  
274 lateral glomerulus (dlG), medio-anterior glomerulus (maG), medio-dorsal glomerulus (mdG),  
275 lateral glomerulus (lG). In addition, we observed a 3-fold increase in the number of *fos*-expressing  
276 neurons in the right dHb following exposure of adult zebrafish to cadaverine relative to delivery  
277 of water alone ( $15.73 \pm 1.25$  vs.  $5.61 \pm 1.07$  cells, Figures 2C-D). The position of the *fos*-expressing  
278 cells in the right dHb corresponds to that of the *lratd2a*-expressing neurons (Figure 2C). Thus, the  
279 *lratd2a* subpopulation in the right dHb responds to cadaverine in both larvae and adults.

280 Exposure to alarm substance prepared from adult zebrafish increased the number of *fos*-  
281 expressing mitral cells not only in the lateral glomerulus (lG) and dlG of the OB as would be  
282 expected (Mathuru *et al.*, 2012; Yoshihara, 2014), but also in the dorso-lateral region of the dHb  
283 (Figures 2C-D). In contrast to cadaverine, alarm substance activated neurons in both the left and  
284 right dHb ( $20.72 \pm 2.70$  cells on the left and  $20.31 \pm 2.53$  on the right).

285

286 **Synaptic inhibition of right dHb *lratd2a* neurons reduces aversive response to cadaverine**

287 To confirm that *lratd2a* expressing neurons play a role in processing of aversive olfactory cues,  
288 we inhibited synaptic transmission in these cells by mating *Tg(lratd2a:QF2)* fish to a newly  
289 generated transgenic line, *Tg(QUAS:BoTxBLC-GFP)<sup>c605</sup>*, in which Botulinum toxin light chain C  
290 (*BoTxBLC*) (Lal *et al.*, 2018; Sternberg *et al.*, 2016; Zhang *et al.*, 2017) is placed under QUAS  
291 control. We tested how adults from the *BoTxBLC-GFP* line reacted to cadaverine by introducing  
292 the odorant to one end of a test tank, and measuring the time individuals spent within or outside of  
293 this region of the tank. Adults bearing *Tg(lratd2a:QF2)* and *Tg(QUAS:BoTxBLC-GFP)* did not  
294 actively avoid the end of the tank where cadaverine was introduced (Supplementary figure 4) as  
295 did their sibling controls.

296 The *Tg(lratd2a:QF2)* driver line is expected to inhibit *lratd2a*-expressing neurons in both  
297 the vHb as well as in the right dHb. We therefore devised an intersectional strategy that combines  
298 Cre/lox mediated recombination (Förster *et al.*, 2017; Satou *et al.*, 2013; Tabor *et al.*, 2019) and  
299 the QF2/QUAS system (Ghosh and Halpern, 2016; Subedi *et al.*, 2014) to block the activity of  
300 neurons selectively in the right dHb. We produced transgenic fish expressing Cre recombinase  
301 under the control of the endogenous *solute carrier family 5 member 7a (slc5a7a)* gene using  
302 CRISPR/Cas9 targeted integration (Kimura *et al.*, 2014) (Figures 3A-B). *slc5a7a* encodes a  
303 choline transporter involved in acetylcholine biosynthesis and, in zebrafish larvae, is strongly  
304 expressed in the right dHb and not in the vHb (Hong *et al.*, 2013). Accordingly, in larvae bearing  
305 the three transgenes *Tg(lratd2a:QF2)<sup>c601</sup>*, *Tg(slc5a7a:Cre)<sup>c662</sup>* and *Tg(QUAS:loxP-mCherry-loxP-*  
306 *GFP-CAAX)<sup>c679</sup>* Cre-mediated recombination resulted in a switch in reporter labeling from red to  
307 green in right dHb neurons (Figure 3C). We followed a similar approach to inhibit synaptic  
308 transmission from *lratd2a* right dHb neurons using Botulinum neurotoxin (Lal *et al.*, 2018;

309 Sternberg *et al.*, 2016; Zhang *et al.*, 2017). A *BoTxBLC-GFP* fusion protein was placed  
310 downstream of a floxed *mCherry* reporter to make *Tg(QUAS:loxP-mCherry-loxP-BoTxBLC-*  
311 *GFP)<sup>c674</sup>*. To validate the effectiveness of this transgenic line, a neuron specific promoter from a  
312 *Xenopus* neural-specific beta tubulin (*Xla.Tubb2*) gene (Peri and Nusslein-Volhard, 2008) was  
313 used to drive QF2 expression. Larvae bearing *Tg(Xla.Tubb2:QF2;hel.1:mCherry)<sup>c663</sup>*;  
314 *Tg(slc5a7a:Cre)<sup>c662</sup>* and *Tg(QUAS:loxP-mCherry-loxP-BoTxBLC-GFP)<sup>c674</sup>* showed a  
315 significantly reduced response to a touch stimulus, indicating that the neurotoxin was produced in  
316 the presence of Cre recombinase (Supplementary figure 5, Supplementary movie 1).

317 *BoTxBLC-GFP* was selectively expressed in *lratd2a/slc5a7a* neurons of the right dHb  
318 (Figure 3D and Supplementary figure 6) in larvae bearing the three transgenes  
319 *Tg(lratd2a:QF2)<sup>c601</sup>*, *Tg(slc5a7a:Cre)<sup>c662</sup>* and *Tg(QUAS:loxP-mCherry-loxP-BoTxBLC-GFP)<sup>c674</sup>*.  
320 Axons labeled by *BoTxBLC-GFP* terminated at the vIPN in the same location as those observed  
321 in *Tg(lratd2a:QF2)* (Figure 3E), suggesting that botulinum neurotoxin inhibits synaptic  
322 transmission within this restricted region of the vIPN.

323 To determine whether the *lratd2a* neurons in the right dHb contributed to the aversive  
324 response to cadaverine, we monitored behavior following its addition. During the first two minutes  
325 following exposure, adults both expressing or not expressing *BoTxBLC-GFP* avoided cadaverine.  
326 However, the aversive response was sustained for 4 min in control fish, but not in those expressing  
327 *BoTxBLC-GFP* in the *lratd2a* neurons of the right dHb (Figures 3F-G). These findings indicate  
328 that this subset of right dHb neurons are required for a prolonged aversive response to cadaverine.

329 Disruption of synaptic transmission in *lratd2a*-expressing Hb neurons alone did not alter  
330 the response of zebrafish to alarm substance, which typically triggers erratic, rapid swimming and  
331 bottom dwelling, followed by freezing behavior (Diaz-Verdugo *et al.*, 2019; Jesuthasan and



332 Mathuru, 2008). Similar to controls, both juveniles and adults expressing *BoTxBLC-GFP* under  
333 the control of *Tg(lratd2a:QF2)<sup>c601</sup>* showed rapid swimming/darting behavior within 22-25 second  
334 after delivery of alarm substance, first doubling their speed of swimming (Figures 3H-J and  
335 Supplementary figure 7), and then freezing for the duration of the 5 min recording period Blocking  
336 the activity of *lratd2a* neurons in the right dHb and in the bilateral vHb is therefore insufficient to  
337 diminish the robust behavioral changes elicited by alarm substance (Figures 3H-J and  
338 Supplementary figures 4C-D).

339

#### 340 **Zebrafish mutants with habenular defects show altered responses to aversive cues**

341 We examined the response to aversive odorants by *tcf7l2<sup>zfs5</sup>* mutants that develop with symmetric  
342 left-isomerized dHb and lack the vHb, but are viable to adulthood (Husken et al., 2014). In  
343 agreement with the transformation of dHb identity, projections from OB mitral cells do not  
344 terminate in the right dHb of homozygous mutants nor are *lratd2a*-expressing neurons or their  
345 efferents to the vIPN detected (Figures 4A-D).

346 Following application of cadaverine, *tcf7l2<sup>zfs5</sup>* homozygous adults did not exhibit the  
347 characteristic avoidance behavior of their wild type siblings (Figure 4E). Exposure to alarm  
348 substance also did not elicit a significant increase in their swimming speed from baseline ( $1.13 \pm$   
349  $0.22$  cm/sec before and  $1.89 \pm 0.56$  cm/sec after) relative to WT siblings ( $2.84 \pm 0.48$  cm/sec before  
350 and  $4.88 \pm 0.63$  cm/sec after, Figure 4F). However, homozygous *tcf7l2<sup>zfs5</sup>* mutants tended to spend  
351 more time swimming in the top half of a novel test tank than wild-type adults, a behavior that was  
352 suppressed in the presence of alarm substance (Fig. 4G).

353 To further assess the role of *lratd2a*-expressing neurons in aversive olfactory processing,  
354 we looked at homozygous mutants of the *brain-specific homeobox (bsx)* gene, which develop

355 right-isomerized dHb [(Schredelseker and Driever, 2018) and Figure 5A] and are viable to  
356 adulthood (Schredelseker and Driever, 2018). As might be expected when both dHb have right  
357 identity, equivalent populations of *lratd2a*-expressing neurons were found on both sides of the  
358 brain (Figure 5C). Instead of innervating only the right dHb as in controls, the axons of *lhx2a:gap-*  
359 *YFP* labeled olfactory mitral cells terminated in the left and right dHb [(Dreosti *et al.*, 2014) and  
360 Figure 5B], where the clusters of *lratd2a* neurons are situated (data not shown). Projections from  
361 the *lratd2a* dHb neurons coursed bilaterally through the left and right fasciculus retroflexus (FR)  
362 and innervated the same limited region of the ventral IPN (Figure 5C).

363 To measure the reaction to cadaverine in *bsx<sup>m1376</sup>* homozygous adults with bilaterally  
364 symmetric *lratd2a* neurons, we counted the number of cells expressing *fos* in the dHb and found  
365 an increase in the left nucleus compared to heterozygous siblings (Figure 5E, Supplementary figure  
366 8). Despite the symmetric activation of dHb neurons, *bsx<sup>m1376/m1376</sup>* mutants did not exhibit  
367 increased avoidance to cadaverine compared to controls (Figure 5D). Overall, homozygous  
368 mutants were slower swimmers than heterozygotes; however, after exposure to alarm substance,  
369 their swimming speed relative to baseline was two-fold faster than that of their heterozygous  
370 siblings (Figure 5F), indicative of an enhanced response to this aversive cue.

371

372 **Discussion**

373 From worms to humans, stimuli including odors are differently perceived by left and right sensory  
374 organs to elicit distinct responses (Gunturkun and Ocklenburg, 2017; Güntürkün et al., 2020).  
375 Honeybees, for example, show an enhanced performance in olfactory learning when their right  
376 antenna is trained to odors (Guo et al., 2016; Letzkus et al., 2006; Rogers and Vallortigara, 2008).  
377 In mice, over one third of mitral/tufted cells were found to be interconnected between the ipsilateral  
378 and contralateral olfactory bulbs for sharing of odor information received separately from each  
379 nostril, and for coordinated perception (Grobman et al., 2018). The zebrafish provides a notable  
380 example of a lateralized olfactory pathway, with the discovery of a subset of bilateral mitral cells  
381 that project to the dorsal habenulae but terminate only at the right nucleus (Miyasaka *et al.*, 2014;  
382 Miyasaka *et al.*, 2009). This finding prompted us to ask what is different about the post-synaptic  
383 dHb neurons that receive this olfactory input and what function does this asymmetric pathway  
384 serve.

385

386 **Aversive olfactory cues activate identified neurons in the right dHb**

387 We previously showed that the olfactory mitral cells that express *lhx2a* and are located in medio-  
388 dorsal and ventro-medial bilateral glomerular clusters (Miyasaka *et al.*, 2014; Miyasaka *et al.*,  
389 2009) project their axons to a subregion of the right dHb where the *lratd2a* gene is transcribed  
390 (deCarvalho *et al.*, 2013). From transgenic labeling with membrane-tagged fluorescent proteins,  
391 we now confirm that the *lhx2a* olfactory neurons precisely terminate at a cluster of *lratd2a/slc5a7a*  
392 expressing cholinergic neurons present in the right but not the left dHb.

393 From calcium imaging, we validated that the right dHb appears more responsive than the  
394 left when larval zebrafish are exposed to aversive odors such as cadaverine or chondroitin sulfate

395 (Jetti *et al.*, 2014; Krishnan *et al.*, 2014), a component of alarm substance (Mathuru *et al.*, 2012),  
396 and further determined that the *lratd2a*-expressing neurons of the right dHb specifically respond  
397 to these aversive olfactory cues. As has also been observed by others (Jesuthasan *et al.*, 2020),  
398 application of vehicle alone, even when introduced slowly into a testing chamber, is sufficient to  
399 elicit a change in GCaMP fluorescence. Determining the habenular response to odorants relative  
400 to vehicle alone is thus an essential measure, but one that has not been reported in all studies (Chen  
401 *et al.*, 2019; Jetti *et al.*, 2014; Krishnan *et al.*, 2014).

402 In adults, we used *fos* expression as a measure of neuronal activation and showed that  
403 transcripts colocalized to *lratd2a*-expressing cells. Interestingly, cadaverine predominantly  
404 activated neurons in the right dHb in larvae and adults, whereas neurons responsive to alarm  
405 substance were detected in both the left and right dHb nuclei of adult zebrafish. Different types of  
406 olfactory cues activate distinct glomeruli in the OB (Friedrich and Korsching, 1997; Yoshihara,  
407 2014), and consistent with the prior studies, we observed that, in adults, cadaverine significantly  
408 increased *fos* expression in the mdG and dG regions, the location of *lhx2a* neurons that project to  
409 the right dHb. By contrast, alarm substance predominantly activated neurons in the lG and dlG  
410 regions of the OB that innervate the telencephalon and posterior tuberculum (Miyasaka *et al.*,  
411 2014; Miyasaka *et al.*, 2009), suggesting that both dHb receive input via this route rather than  
412 through direct olfactory connections. Indeed, we found that more neurons reacted to alarm  
413 substance than cadaverine throughout the brain, including in the Dp, Vv and thalamic areas (data  
414 not shown).

415 In previous experiments (deCarvalho *et al.*, 2013), we did not detect activated neurons in  
416 the right dHb of adult zebrafish following exposure to cadaverine or alarm substance. Several  
417 factors could account for the difference from the earlier study: we now have the transgenic tools

418 to examine *lratd2a* neurons directly, we used higher concentrations of cadaverine and alarm  
419 substance and, in contrast to delivering odorants to groups of zebrafish, we tested the neuronal  
420 response in individual adults.

421 It has been suggested that lateralized olfactory and visual functions of the dHb are more  
422 prominent early in development and less so at later stages (Fore et al., 2020). However, the  
423 presence of *lratd2a*-expressing neurons in the right dHb and their preferential response to  
424 cadaverine from larval to juvenile and adult stages supports the persistence of lateralized activity  
425 and illustrates the value of examining defined neuronal populations.

426

#### 427 **Right dHb neurons mediate aversive behavioral responses**

428 Despite both being aversive cues (Hussain *et al.*, 2013; Mathuru *et al.*, 2012), cadaverine  
429 and alarm substance elicit different behavioral responses by adult zebrafish. Control fish show  
430 active avoidance to cadaverine for the first to 2 to 4 minutes of a 5 minute testing period, whereas  
431 alarm substance triggers immediate erratic behavior such as rapid swimming and darting that is  
432 typically followed by prolonged freezing (Hussain *et al.*, 2013; Mathuru *et al.*, 2012).

433 We found that perturbation of the *lratd2a*-expressing right dHb neurons either selectively  
434 by *BoTxBLC*-mediated synaptic inactivation, or in *tcf7l2<sup>z/55</sup>* homozygous mutants that completely  
435 lack them, reduced avoidance to cadaverine, either in the length or degree of the response.

436 However, juveniles or adults with *BoTxBLC* inactivated neurons displayed a similar  
437 response to alarm substance as controls. In contrast, *tcf7l2<sup>z/55</sup>* mutants, showed no difference in  
438 their swimming behavior before and after its addition. One explanation is that many regions  
439 throughout the brain are likely involved in directing the complex repertoire of behaviors elicited  
440 by alarm substance and inactivation of *lratd2a* neurons in the habenular region alone is insufficient

441 to weaken the overall response. Our findings also rule out a role for the ventral habenulae in the  
442 response to alarm substance, as the reaction to alarm substance was intact in transgenic adults in  
443 which *lratd2a* neurons were inactivated by *BoTxBLC* in the bilateral vHb as well as in the right  
444 dHb. Alternatively, the *tcf7l2<sup>z55</sup>* mutation could disrupt other brain regions that regulate behaviors  
445 elicited by alarm substance since the *tfc7l2* gene is expressed in neurons throughout the brain,  
446 including the anterior tectum, dorsal thalamus and the hindbrain (Young et al., 2002).

447 Similar to *tcf7l2<sup>z55</sup>*, the *bsx<sup>m1376</sup>* mutation is pleiotropic not only resulting in right-  
448 isomerization of the dHb due to the absence of the parapineal (Schredelseker and Driever, 2018),  
449 but also loss of the terminal tuberal hypothalamus, mammillary hypothalamic regions and  
450 secondary prosencephalon (Schredelseker et al., 2020). Although homozygous mutants showed a  
451 hyperactive response to alarm substance relative to controls, we cannot discount the involvement  
452 of other affected brain regions. Albeit technically challenging in adults, a more selective test such  
453 as optogenetic activation of only the *lratd2a* dHb neurons in wild-type and mutant zebrafish could  
454 help resolve their contribution to the alarm response.

455 The identification of a subset of neurons in the right dHb that receive olfactory input and  
456 terminate their axons at a defined subregion of the ventral IPN lays the groundwork for tracing an  
457 entire pathway from olfactory receptors to the neurons directing the appropriate behavioral  
458 response. The midline IPN has been morphologically defined into subregions (deCarvalho *et al.*,  
459 2014; Lima et al., 2017; Quina et al., 2017), but their connectivity and functional properties have  
460 been understudied. Recent work has begun to assign different functions to given subregions, such  
461 as the role of the rostral IPN in nicotine aversion (Morton et al., 2018; Quina *et al.*, 2017). Neurons  
462 in the ventral IPN project to the raphe nucleus (Agetsuma et al., 2010; Lima *et al.*, 2017), but the  
463 precise identity of raphe neurons that are innervated by the *lratd2a*-expressing dHb neurons

464 remains to be determined. Transcriptional profiling of the IPN should yield useful information on  
465 its diverse neuronal populations and likely lead to the identification of the relevant post-synaptic  
466 targets in the ventral IPN and their efferent connections. Elaboration of this pathway may also help  
467 explain the advantage of lateralization in the processing of aversive information. It has been  
468 argued, for instance, that the antennal specialization to aversive odors in bees is correlated with  
469 directed turning away from the stimulus and escape (Rogers and Vallortigara, 2019). Beyond  
470 olfaction, left-right asymmetry appears to be a more general feature of stress-inducing, aversive  
471 responses as demonstrated for the rat ventral hippocampus (Sakaguchi and Sakurai, 2017) and  
472 human pre-frontal cortex, where heightened anxiety also activates more neurons on the right than  
473 on the left (Avram et al., 2010; Ocklenburg et al., 2016).

474

475

476 **References**

- 477 Agetsuma, M., Aizawa, H., Aoki, T., Nakayama, R., Takahoko, M., Goto, M., Sassa, T., Amo, R.,  
478 Shiraki, T., Kawakami, K., et al. (2010). The habenula is crucial for experience-dependent  
479 modification of fear responses in zebrafish. *Nat Neurosci* *13*, 1354-1356. 10.1038/nn.2654.
- 480 Amo, R., Aizawa, H., Takahoko, M., Kobayashi, M., Takahashi, R., Aoki, T., and Okamoto, H.  
481 (2010). Identification of the Zebrafish Ventral Habenula As a Homolog of the Mammalian Lateral  
482 Habenula. *The Journal of Neuroscience* *30*, 1566-1574. 10.1523/jneurosci.3690-09.2010.
- 483 Auer, T.O., Duroure, K., De Cian, A., Concordet, J.-P., and Del Bene, F. (2014). Highly efficient  
484 CRISPR/Cas9-mediated knock-in in zebrafish by homology-independent DNA repair. *Genome*  
485 *research* *24*, 142-153. 10.1101/gr.161638.113.
- 486 Avram, J., Balteş, F.R., Miclea, M., and Miu, A.C. (2010). Frontal EEG Activation Asymmetry  
487 Reflects Cognitive Biases in Anxiety: Evidence from an Emotional Face Stroop Task. *Applied*  
488 *Psychophysiology and Biofeedback* *35*, 285-292. 10.1007/s10484-010-9138-6.
- 489 Chen, W.-y., Peng, X.-l., Deng, Q.-s., Chen, M.-j., Du, J.-l., and Zhang, B.-b. (2019). Role of  
490 Olfactorily Responsive Neurons in the Right Dorsal Habenula–Ventral Interpeduncular Nucleus  
491 Pathway in Food-Seeking Behaviors of Larval Zebrafish. *Neuroscience* *404*, 259-267.  
492 <https://doi.org/10.1016/j.neuroscience.2019.01.057>.
- 493 deCarvalho, T.N., Akitake, C.M., Thisse, C., Thisse, B., and Halpern, M.E. (2013). Aversive cues  
494 fail to activate fos expression in the asymmetric olfactory-habenula pathway of zebrafish. *Front*  
495 *Neural Circuits* *7*, 98. 10.3389/fncir.2013.00098.
- 496 deCarvalho, T.N., Subedi, A., Rock, J., Harfe, B.D., Thisse, C., Thisse, B., Halpern, M.E., and  
497 Hong, E. (2014). Neurotransmitter map of the asymmetric dorsal habenular nuclei of zebrafish.  
498 *genesis* *52*, 636-655. 10.1002/dvg.22785.
- 499 Diaz-Verdugo, C., Sun, G.J., Fawcett, C.H., Zhu, P., and Fishman, M.C. (2019). Mating  
500 Suppresses Alarm Response in Zebrafish. *Current Biology* *29*, 2541-2546.e2543.  
501 10.1016/j.cub.2019.06.047.
- 502 Dieris, M., Ahuja, G., Krishna, V., and Korsching, S.I. (2017). A single identified glomerulus in  
503 the zebrafish olfactory bulb carries the high-affinity response to death-associated odor cadaverine.  
504 *Scientific reports* *7*, 40892. 10.1038/srep40892.
- 505 Dreosti, E., Vendrell Llopis, N., Carl, M., Yaksi, E., and Wilson, S.W. (2014). Left-right  
506 asymmetry is required for the habenulae to respond to both visual and olfactory stimuli. *Curr Biol*  
507 *24*, 440-445. 10.1016/j.cub.2014.01.016.



- 508 Duboué, E.R., Hong, E., Eldred, K.C., and Halpern, M.E. (2017). Left Habenular Activity  
509 Attenuates Fear Responses in Larval Zebrafish. *Current Biology* 27, 2154-2162 e2153.  
510 <https://doi.org/10.1016/j.cub.2017.06.017>.
- 511 Facchin, L., Duboué, E.R., and Halpern, M.E. (2015). Disruption of Epithalamic Left–Right  
512 Asymmetry Increases Anxiety in Zebrafish. *The Journal of Neuroscience* 35, 15847-15859.  
513 10.1523/jneurosci.2593-15.2015.
- 514 Fore, S., Acuña-Hinrichsen, F., Mutlu, K.A., Bartoszek, E.M., Serneels, B., Fatuos, N.G., Chau,  
515 K.T.P., Cosacak, M.I., Verdugo, C.D., Palumbo, F., et al. (2020). Functional properties of  
516 habenular neurons are determined by developmental stage and sequential neurogenesis. *Science*  
517 *Advances* 6, eaaz3173. 10.1126/sciadv.aaz3173.
- 518 Friedrich, R.W., and Korsching, S.I. (1997). Combinatorial and Chemotopic Odorant Coding in  
519 the Zebrafish Olfactory Bulb Visualized by Optical Imaging. *Neuron* 18, 737-752. 10.1016/S0896-  
520 6273(00)80314-1.
- 521 Förster, D., Arnold-Ammer, I., Laurell, E., Barker, A.J., Fernandes, A.M., Finger-Baier, K., Filosa,  
522 A., Helmbrecht, T.O., Kölsch, Y., Kühn, E., et al. (2017). Genetic targeting and anatomical  
523 registration of neuronal populations in the zebrafish brain with a new set of BAC transgenic tools.  
524 *Scientific reports* 7, 5230. 10.1038/s41598-017-04657-x.
- 525 Gamse, J.T., Shen, Y.C., Thisse, C., Thisse, B., Raymond, P.A., Halpern, M.E., and Liang, J.O.  
526 (2002). *Otx5* regulates genes that show circadian expression in the zebrafish pineal complex. *Nat*  
527 *Genet* 30, 117-121. 10.1038/ng793.
- 528 Ghosh, A., and Halpern, M.E. (2016). Chapter 10 - Transcriptional regulation using the Q system  
529 in transgenic zebrafish. In *Methods in cell biology*, M.W. H. William Detrich, and I.Z. Leonard,  
530 eds. (Academic Press), pp. 205-218. <http://dx.doi.org/10.1016/bs.mcb.2016.05.001>.
- 531 Grobman, M., Dalal, T., Lavian, H., Shmuel, R., Belelovsky, K., Xu, F., Korngreen, A., and  
532 Haddad, R. (2018). A Mirror-Symmetric Excitatory Link Coordinates Odor Maps across Olfactory  
533 Bulbs and Enables Odor Perceptual Unity. *Neuron* 99, 800-813.e806.  
534 <https://doi.org/10.1016/j.neuron.2018.07.012>.
- 535 Gunturkun, O., and Ocklenburg, S. (2017). Ontogenesis of Lateralization. *Neuron* 94, 249-263.  
536 10.1016/j.neuron.2017.02.045.
- 537 Guo, Y., Wang, Z., Li, Y., Wei, G., Yuan, J., Sun, Y., Wang, H., Qin, Q., Zeng, Z., Zhang, S., and  
538 Chen, R. (2016). Lateralization of gene expression in the honeybee brain during olfactory learning.  
539 *Scientific reports* 6, 34727-34727. 10.1038/srep34727.

- 540 Güntürkün, O., Ströckens, F., and Ocklenburg, S. (2020). Brain Lateralization: A Comparative  
541 Perspective. *Physiological Reviews* *100*, 1019-1063. 10.1152/physrev.00006.2019.
- 542 Hikosaka, O. (2010). The habenula: from stress evasion to value-based decision-making. *Nat Rev*  
543 *Neurosci* *11*, 503-513. 10.1038/nrn2866.
- 544 Hong, E., Santhakumar, K., Akitake, C.A., Ahn, S.J., Thisse, C., Thisse, B., Wyart, C., Mangin,  
545 J.-M., and Halpern, M.E. (2013). Cholinergic left-right asymmetry in the habenulo-  
546 interpeduncular pathway. *Proceedings of the National Academy of Sciences* *110*, 21171-21176.  
547 10.1073/pnas.1319566110.
- 548 Hsu, Y.-W.A., Morton, G., Guy, E.G., Wang, S.D., and Turner, E.E. (2016). Dorsal Medial  
549 Habenula Regulation of Mood-Related Behaviors and Primary Reinforcement by Tachykinin-  
550 Expressing Habenula Neurons. *eneuro* *3*. 10.1523/eneuro.0109-16.2016.
- 551 Husken, U., Stickney, H.L., Gestri, G., Bianco, I.H., Faro, A., Young, R.M., Roussigne, M.,  
552 Hawkins, T.A., Beretta, C.A., Brinkmann, I., et al. (2014). Tcf7l2 is required for left-right  
553 asymmetric differentiation of habenular neurons. *Curr Biol* *24*, 2217-2227.  
554 10.1016/j.cub.2014.08.006.
- 555 Hussain, A., Saraiva, L.R., Ferrero, D.M., Ahuja, G., Krishna, V.S., Liberles, S.D., and Korsching,  
556 S.I. (2013). High-affinity olfactory receptor for the death-associated odor cadaverine. *Proceedings*  
557 *of the National Academy of Sciences* *110*, 19579-19584. 10.1073/pnas.1318596110.
- 558 Hwang, W.Y., Fu, Y., Reyon, D., Maeder, M.L., Tsai, S.Q., Sander, J.D., Peterson, R.T., Yeh,  
559 J.R., and Joung, J.K. (2013). Efficient genome editing in zebrafish using a CRISPR-Cas system.  
560 *Nat Biotechnol* *31*, 227-229. 10.1038/nbt.2501.
- 561 Jao, L.E., Wentz, S.R., and Chen, W. (2013). Efficient multiplex biallelic zebrafish genome editing  
562 using a CRISPR nuclease system. *Proceedings of the National Academy of Sciences of the United*  
563 *States of America* *110*, 13904-13909. 10.1073/pnas.1308335110.
- 564 Jesuthasan, S., Krishnan, S., Cheng, R.-K., and Mathuru, A. (2020). Neural correlates of state  
565 transitions elicited by a chemosensory danger cue. *Progress in Neuro-Psychopharmacology and*  
566 *Biological Psychiatry*, 110110. <https://doi.org/10.1016/j.pnpbp.2020.110110>.
- 567 Jesuthasan, S.J., and Mathuru, A.S. (2008). The alarm response in zebrafish: innate fear in a  
568 vertebrate genetic model. *J Neurogenet* *22*, 211-228. 10.1080/01677060802298475.
- 569 Jetti, S.K., Vendrell-Llopis, N., and Yaksi, E. (2014). Spontaneous activity governs olfactory  
570 representations in spatially organized habenular microcircuits. *Curr Biol* *24*, 434-439.  
571 10.1016/j.cub.2014.01.015.

- 572 Kimura, Y., Hisano, Y., Kawahara, A., and Higashijima, S. (2014). Efficient generation of knock-  
573 in transgenic zebrafish carrying reporter/driver genes by CRISPR/Cas9-mediated genome  
574 engineering. *Sci Rep* 4, 6545. 10.1038/srep06545.
- 575 Koide, T., Miyasaka, N., Morimoto, K., Asakawa, K., Urasaki, A., Kawakami, K., and Yoshihara,  
576 Y. (2009). Olfactory neural circuitry for attraction to amino acids revealed by transposon-mediated  
577 gene trap approach in zebrafish. *Proceedings of the National Academy of Sciences* 106, 9884-  
578 9889. 10.1073/pnas.0900470106.
- 579 Krishnan, S., Mathuru, A.S., Kibat, C., Rahman, M., Lupton, C.E., Stewart, J., Claridge-Chang,  
580 A., Yen, S.C., and Jesuthasan, S. (2014). The right dorsal habenula limits attraction to an odor in  
581 zebrafish. *Curr Biol* 24, 1167-1175. 10.1016/j.cub.2014.03.073.
- 582 Kwan, K.M., Fujimoto, E., Grabher, C., Mangum, B.D., Hardy, M.E., Campbell, D.S., Parant,  
583 J.M., Yost, H.J., Kanki, J.P., and Chien, C.-B. (2007). The Tol2kit: A multisite gateway-based  
584 construction kit for Tol2 transposon transgenesis constructs. *Developmental Dynamics* 236, 3088-  
585 3099. 10.1002/dvdy.21343.
- 586 Lal, P., Tanabe, H., Suster, M.L., Ailani, D., Kotani, Y., Muto, A., Ito, M., Iwasaki, M., Wada,  
587 H., Yaksi, E., and Kawakami, K. (2018). Identification of a neuronal population in the  
588 telencephalon essential for fear conditioning in zebrafish. *BMC Biology* 16, 45. 10.1186/s12915-  
589 018-0502-y.
- 590 Letzkus, P., Ribi, W.A., Wood, J.T., Zhu, H., Zhang, S.-W., and Srinivasan, M.V. (2006).  
591 Lateralization of Olfaction in the Honeybee *Apis mellifera*. *Current Biology* 16, 1471-1476.  
592 10.1016/j.cub.2006.05.060.
- 593 Lima, L.B., Bueno, D., Leite, F., Souza, S., Gonçalves, L., Furigo, I.C., Donato, J., and Metzger,  
594 M. (2017). Afferent and efferent connections of the interpeduncular nucleus with special reference  
595 to circuits involving the habenula and raphe nuclei. *Journal of Comparative Neurology* 525, 2411-  
596 2442. 10.1002/cne.24217.
- 597 Mathuru, Ajay S., Kibat, C., Cheong, Wei F., Shui, G., Wenk, Markus R., Friedrich, Rainer W.,  
598 and Jesuthasan, S. (2012). Chondroitin Fragments Are Odorants that Trigger Fear Behavior in  
599 Fish. *Current Biology* 22, 538-544. <http://dx.doi.org/10.1016/j.cub.2012.01.061>.
- 600 Miyasaka, N., Arganda-Carreras, I., Wakisaka, N., Masuda, M., Sumbul, U., Seung, H.S., and  
601 Yoshihara, Y. (2014). Olfactory projectome in the zebrafish forebrain revealed by genetic single-  
602 neuron labelling. *Nature communications* 5, 3639. 10.1038/ncomms4639.
- 603 Miyasaka, N., Morimoto, K., Tsubokawa, T., Higashijima, S., Okamoto, H., and Yoshihara, Y.  
604 (2009). From the olfactory bulb to higher brain centers: genetic visualization of secondary  
605 olfactory pathways in zebrafish. *The Journal of neuroscience* 29, 4756-4767.  
606 10.1523/JNEUROSCI.0118-09.2009.

- 607 Morton, G., Nasirova, N., Sparks, D.W., Brodsky, M., Sivakumaran, S., Lambe, E.K., and Turner,  
608 E.E. (2018). Chrna5-Expressing Neurons in the Interpeduncular Nucleus Mediate Aversion  
609 Primed by Prior Stimulation or Nicotine Exposure. *The Journal of Neuroscience* 38, 6900-6920.  
610 [10.1523/jneurosci.0023-18.2018](https://doi.org/10.1523/jneurosci.0023-18.2018).
- 611 Muncan, V., Faro, A., Haramis, A.-P.G., Hurlstone, A.F.L., Wienholds, E., van Es, J., Korving, J.,  
612 Begthel, H., Zivkovic, D., and Clevers, H. (2007). T-cell factor 4 (Tcf712) maintains proliferative  
613 compartments in zebrafish intestine. *EMBO reports* 8, 966-973. [10.1038/sj.embor.7401071](https://doi.org/10.1038/sj.embor.7401071).
- 614 Ocklenburg, S., Korte, S.M., Peterburs, J., Wolf, O.T., and Güntürkün, O. (2016). Stress and  
615 laterality – The comparative perspective. *Physiology & Behavior* 164, 321-329.  
616 <https://doi.org/10.1016/j.physbeh.2016.06.020>.
- 617 Okamoto, H., Agetsuma, M., and Aizawa, H. (2012). Genetic dissection of the zebrafish habenula,  
618 a possible switching board for selection of behavioral strategy to cope with fear and anxiety.  
619 *Developmental neurobiology* 72, 386-394. [10.1002/dneu.20913](https://doi.org/10.1002/dneu.20913).
- 620 Peri, F., and Nusslein-Volhard, C. (2008). Live imaging of neuronal degradation by microglia  
621 reveals a role for v0-ATPase a1 in phagosomal fusion in vivo. *Cell* 133, 916-927.  
622 [10.1016/j.cell.2008.04.037](https://doi.org/10.1016/j.cell.2008.04.037).
- 623 Potter, C.J., Tasic, B., Russler, E.V., Liang, L., and Luo, L. (2010). The Q System: A Repressible  
624 Binary System for Transgene Expression, Lineage Tracing, and Mosaic Analysis. *Cell* 141, 536-  
625 548. [10.1016/j.cell.2010.02.025](https://doi.org/10.1016/j.cell.2010.02.025).
- 626 Quina, L.A., Harris, J., Zeng, H., and Turner, E.E. (2017). Specific connections of the  
627 interpeduncular subnuclei reveal distinct components of the habenulopeduncular pathway. *Journal*  
628 *of Comparative Neurology* 525, n/a-n/a. [10.1002/cne.24221](https://doi.org/10.1002/cne.24221).
- 629 Rogers, L.J., and Vallortigara, G. (2008). From antenna to antenna: lateral shift of olfactory  
630 memory recall by honeybees. *PloS one* 3, e2340-e2340. [10.1371/journal.pone.0002340](https://doi.org/10.1371/journal.pone.0002340).
- 631 Rogers, L.J., and Vallortigara, G. (2019). Complementary Specializations of the Left and Right  
632 Sides of the Honeybee Brain. *Front Psychol* 10, 280. [10.3389/fpsyg.2019.00280](https://doi.org/10.3389/fpsyg.2019.00280).
- 633 Sakaguchi, Y., and Sakurai, Y. (2017). Left–right functional asymmetry of ventral hippocampus  
634 depends on aversiveness of situations. *Behavioural Brain Research* 325, 25-33.  
635 <https://doi.org/10.1016/j.bbr.2017.02.028>.
- 636 Sander, J.D., Maeder, M.L., Reyon, D., Voytas, D.F., Joung, J.K., and Dobbs, D. (2010). ZiFiT  
637 (Zinc Finger Targeter): an updated zinc finger engineering tool. *Nucleic Acids Research* 38,  
638 W462-W468. [10.1093/nar/gkq319](https://doi.org/10.1093/nar/gkq319).

- 639 Satou, C., Kimura, Y., Hirata, H., Suster, M.L., Kawakami, K., and Higashijima, S.-i. (2013).  
640 Transgenic tools to characterize neuronal properties of discrete populations of zebrafish neurons.  
641 *Development* 140, 3927-3931. 10.1242/dev.099531.
- 642 Schindelin, J., Arganda-Carreras, I., Frise, E., Kaynig, V., Longair, M., Pietzsch, T., Preibisch, S.,  
643 Rueden, C., Saalfeld, S., Schmid, B., et al. (2012). Fiji: an open-source platform for biological-  
644 image analysis. *Nature methods* 9, 676. 10.1038/nmeth.2019  
645 <https://www.nature.com/articles/nmeth.2019#supplementary-information>.
- 646 Schredelseker, T., and Driever, W. (2018). Bsx controls pineal complex development.  
647 *Development* 145, dev163477. 10.1242/dev.163477.
- 648 Schredelseker, T., Veit, F., Dorsky, R.I., and Driever, W. (2020). Bsx Is Essential for  
649 Differentiation of Multiple Neuromodulatory Cell Populations in the Secondary Prosencephalon.  
650 *Frontiers in neuroscience* 14. 525. 10.3389/fnins.2020.00525.
- 651 Severi, Kristen E., Portugues, R., Marques, João C., O'Malley, Donald M., Orger, Michael B., and  
652 Engert, F. (2014). Neural Control and Modulation of Swimming Speed in the Larval Zebrafish.  
653 *Neuron* 83, 692-707. <https://doi.org/10.1016/j.neuron.2014.06.032>.
- 654 Siniscalchi, M. (2017). Olfactory Lateralization. In *Lateralized Brain Functions: Methods in*  
655 *Human and Non-Human Species*, L.J. Rogers, and G. Vallortigara, eds. (Springer New York), pp.  
656 103-120. 10.1007/978-1-4939-6725-4\_4.
- 657 Sternberg, Jenna R., Severi, Kristen E., Fidelin, K., Gomez, J., Ihara, H., Alcheikh, Y., Hubbard,  
658 Jeffrey M., Kawakami, K., Suster, M., and Wyart, C. (2016). Optimization of a Neurotoxin to  
659 Investigate the Contribution of Excitatory Interneurons to Speed Modulation In Vivo. *Current*  
660 *Biology* 26, 2319-2328. <http://dx.doi.org/10.1016/j.cub.2016.06.037>.
- 661 Subedi, A., Macurak, M., Gee, S.T., Monge, E., Goll, M.G., Potter, C.J., Parsons, M.J., and  
662 Halpern, M.E. (2014). Adoption of the Q transcriptional regulatory system for zebrafish  
663 transgenesis. *Methods* 66, 433-440. 10.1016/j.ymeth.2013.06.012.
- 664 Suster, M.L., Abe, G., Schouw, A., and Kawakami, K. (2011). Transposon-mediated BAC  
665 transgenesis in zebrafish. *Nat. Protocols* 6, 1998-2021.  
666 [http://www.nature.com/nprot/journal/v6/n12/abs/nprot.2011.416.html#supplementary-](http://www.nature.com/nprot/journal/v6/n12/abs/nprot.2011.416.html#supplementary-information)  
667 [information](http://www.nature.com/nprot/journal/v6/n12/abs/nprot.2011.416.html#supplementary-information).
- 668 Tabor, K.M., Marquart, G.D., Hurt, C., Smith, T.S., Geoca, A.K., Bhandiwad, A.A., Subedi, A.,  
669 Sinclair, J.L., Rose, H.M., Polys, N.F., and Burgess, H.A. (2019). Brain-wide cellular resolution  
670 imaging of Cre transgenic zebrafish lines for functional circuit-mapping. *eLife* 8, e42687.  
671 10.7554/eLife.42687.

- 672 Wakisaka, N., Miyasaka, N., Koide, T., Masuda, M., Hiraki-Kajiyama, T., and Yoshihara, Y.  
673 (2017). An Adenosine Receptor for Olfaction in Fish. *Current Biology* 27. 1437-1447 e1434.  
674 <https://doi.org/10.1016/j.cub.2017.04.014>.
- 675 Walker, C. (1998). Chapter 3 Haploid Screens and Gamma-Ray Mutagenesis. In *Methods in Cell*  
676 *Biology*, H.W. Detrich, M. Westerfield, and L.I. Zon, eds. (Academic Press), pp. 43-70.  
677 [https://doi.org/10.1016/S0091-679X\(08\)61893-2](https://doi.org/10.1016/S0091-679X(08)61893-2).
- 678 Xie, X., Mathias, J.R., Smith, M.-A., Walker, S.L., Teng, Y., Distel, M., Köster, R.W., Sirotkin,  
679 H.I., Saxena, M.T., and Mumm, J.S. (2012). Silencer-delimited transgenesis: NRSE/RE1  
680 sequences promote neural-specific transgene expression in a NRSF/REST-dependent manner.  
681 *BMC Biology* 10, 93. 10.1186/1741-7007-10-93.
- 682 Yoshihara, Y. (2014). Zebrafish Olfactory System. In *The Olfactory System: From Odor*  
683 *Molecules to Motivational Behaviors*, K. Mori, ed. (Springer Japan), pp. 71-96. 10.1007/978-4-  
684 431-54376-3\_5.
- 685 Young, R.M., Reyes, A.E., and Allende, M.L. (2002). Expression and splice variant analysis of  
686 the zebrafish *tcf4* transcription factor. *Mechanisms of Development* 117, 269-273.  
687 [https://doi.org/10.1016/S0925-4773\(02\)00180-6](https://doi.org/10.1016/S0925-4773(02)00180-6).
- 688 Zhang, B.B., Yao, Y.Y., Zhang, H.F., Kawakami, K., and Du, J.L. (2017). Left Habenula Mediates  
689 Light-Preference Behavior in Zebrafish via an Asymmetrical Visual Pathway. *Neuron* 93, 914-  
690 928. e914. 10.1016/j.neuron.2017.01.011.  
691  
692

693 **Acknowledgement**

694 We thank Shin-ichi Higashijima for the *Gbait-hsp70:Gal4* donor plasmid, Wenbiao Chen for  
695 *pT3TS nCas9n* plasmid, Koichi Kawakami for the *UAS:zBoTXBLC-GFP* construct, Paul Krieg for  
696 the *Xla.Tubb* promoter construct, Claire Wyart for *GCaMP6f* plasmid and Wolfgang Driever and  
697 Tatjana Piotrowski for providing *bsx<sup>m1376</sup>* and *tcf7l2<sup>zf5</sup>* mutant zebrafish, respectively.

698

699 **Author contributions**

700 J-H.C. and M.E.H. conceived of and designed the study and wrote the manuscript. J-H.C.  
701 performed all of the experiments. E.D. wrote MATLAB script for analyzing behavioral  
702 experiments. M.M. constructed sgRNAs for *lratd2a* and *slc5a7a*. J-M.C. generated Tol2  
703 constructs and transgenic lines. All authors reviewed the manuscript.

704

705

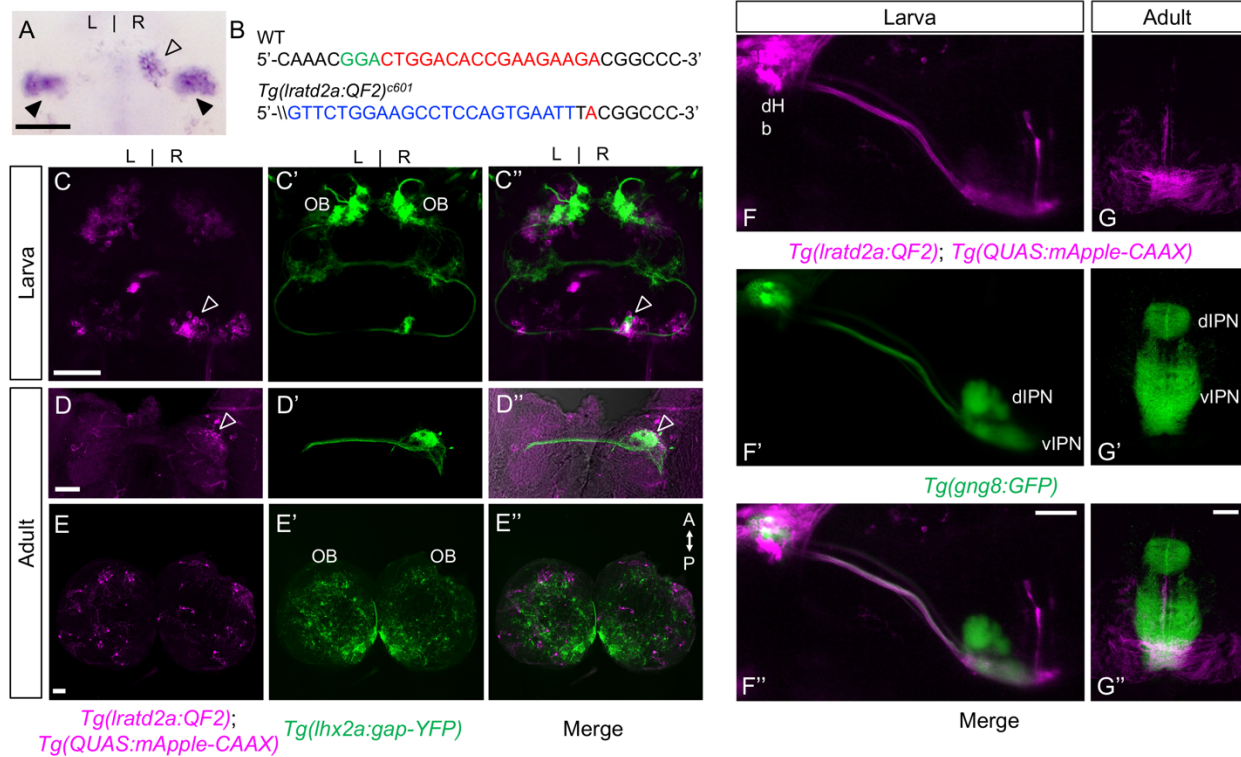

706

707 **Figure 1. *lratd2a*-expressing neurons in the right dHb connect asymmetric pathway from the**

708 **olfactory bulb to ventral IPN (A) Pattern of *lratd2a* expression at 5 days post fertilization (dpf),**

709 open arrowhead indicates right dHb and black arrowheads the bilateral vHb. (B) Sequences of WT

710 (top) and transgenic fish (bottom) with QF2 integrated within the first exon of the *lratd2a* gene.

711 PAM sequences are green, the sgRNA binding site red and donor DNA blue. Confocal dorsal

712 views of *Tg(lratd2a:QF2)*, *Tg(QUAS:mApple-CAAX)* and *Tg(lhx2a:gap-YFP)* labeling in a (C-

713 C'') 5 dpf larva and in transverse sections of the adult brain at 3 months post-fertilization (mpf) at

714 the level of the (D-D'') dHb and (E-E'') olfactory bulb. Axons of *lhx2a* olfactory mitral cells (open

715 arrowheads, C and D) terminate at *lratd2a* dHb neurons. (F-F'') Lateral view of *Tg(lratd2a:QF2)*,

716 *Tg(QUAS:mApple-CAAX)*, *Tg(gng8:GFP)* larva at 6 dpf with mApple labeled dHb terminals at

717 the ventral interpeduncular nucleus (vIPN). Dorsal habenular nuclei (dHb), dorsal interpeduncular

718 nucleus (dIPN). (G-G'') Axonal endings of *lratd2a* dHb neurons are restricted to the ventralmost



719 region of the vIPN in transverse section of 2.5 mpf adult brain. Scale bar, 50  $\mu$ m. A-P, anterior to  
720 posterior; L-R, left-right; OB, olfactory bulb.

721

722

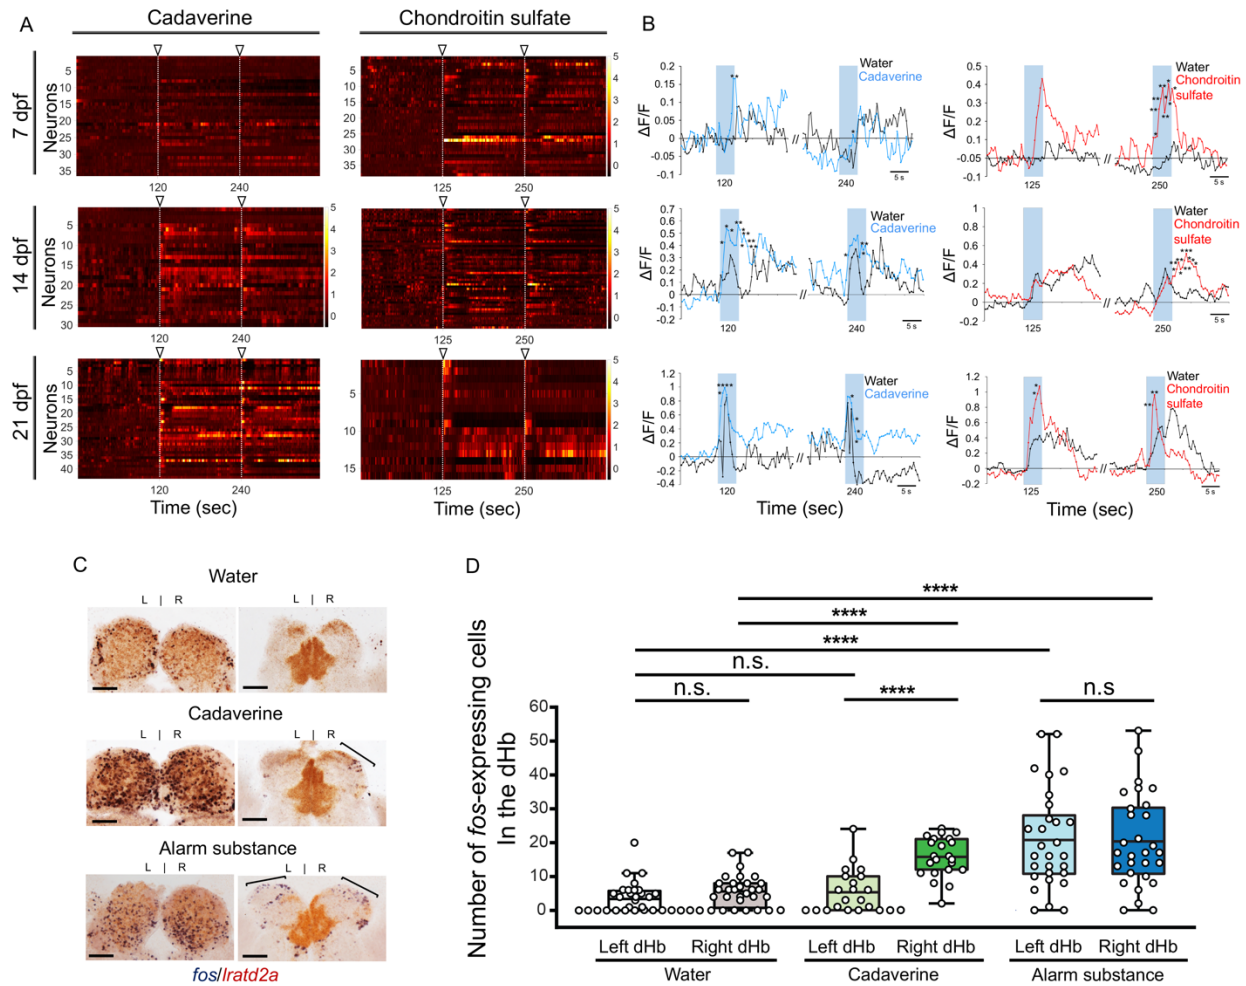

723

724 **Figure 2. Increased activity of *lratd2a*-expressing dHb neurons upon exposure to aversive**

725 **olfactory cues (A) Change in GCaMP fluorescence intensity ( $\Delta F/F$ ) of *lratd2a* neurons in the right**

726 **dHb in response to cadaverine ( $n = 36$  neurons in 5 larvae at 7 dpf, 30 neurons in 5 larvae at 14**

727 **dpf and 43 neurons in 5 larvae at 21 dpf) or chondroitin sulfate ( $n = 38$  neurons in 4 larvae at 7**

728 **dpf, 53 neurons in 5 larvae at 14 dpf and 16 neurons in 2 larvae at 21 dpf). Open arrowheads**

729 **indicate the time of odorant delivery. (B) Average change in fluorescence ( $\Delta F/F$ ) in seconds (sec)**

730 **for all *lratd2a* positive neurons in the larval right dHb. Blue bars indicate 5 sec periods of odor**

731 **delivery. (C) *fos* (blue) and *lratd2a* (brown) transcripts in adult olfactory bulbs (left panels) and**

732 habenulae (right panels) detected by RNA *in situ* hybridization 30 min after addition of water,  
733 cadaverine or alarm substance to the test tank. Brackets indicate *fos*-expressing cells. Scale bar,  
734 100  $\mu$ m. (D) Quantification of *fos*-expressing cells in the adult dHb after addition of vehicle alone  
735 [ $3.58 \pm 0.92$  cells in the left and  $5.61 \pm 1.07$  in the right dHb,  $n = 16$  fish (Mann-Whitney  $U = 349$ ,  
736  $P = 0.065$ )], cadaverine [ $5.32 \pm 1.36$  cells in the left and  $15.73 \pm 1.25$  in the right dHb,  $n = 11$  fish  
737 (Mann-Whitney  $U = 57$ ,  $P < 0.00001$ )], or alarm substance [ $20.72 \pm 2.70$  cells in the left and  $20.31$   
738  $\pm 2.53$  in the right dHb,  $n = 17$  fish (Mann-Whitney  $U = 414.5$ ,  $P = 0.928$ )]. For the right dHb,  
739 significantly more cells were *fos* positive after addition of either cadaverine ( $P = 5.5217E-08$ ) or  
740 alarm substance ( $P = 3.78292E-06$ ). For the left dHb, a significant difference was only observed  
741 after addition of alarm substance ( $P = 7.44458 E-07$ ). For B and D, Student's t-test. \* $P < 0.05$ ; \*\* $P$   
742  $< 0.01$ ; \*\*\* $P < 0.001$ ; \*\*\*\* $P < 0.0001$ ; *n.s.*, not significant ( $P > 0.05$ ).  
743

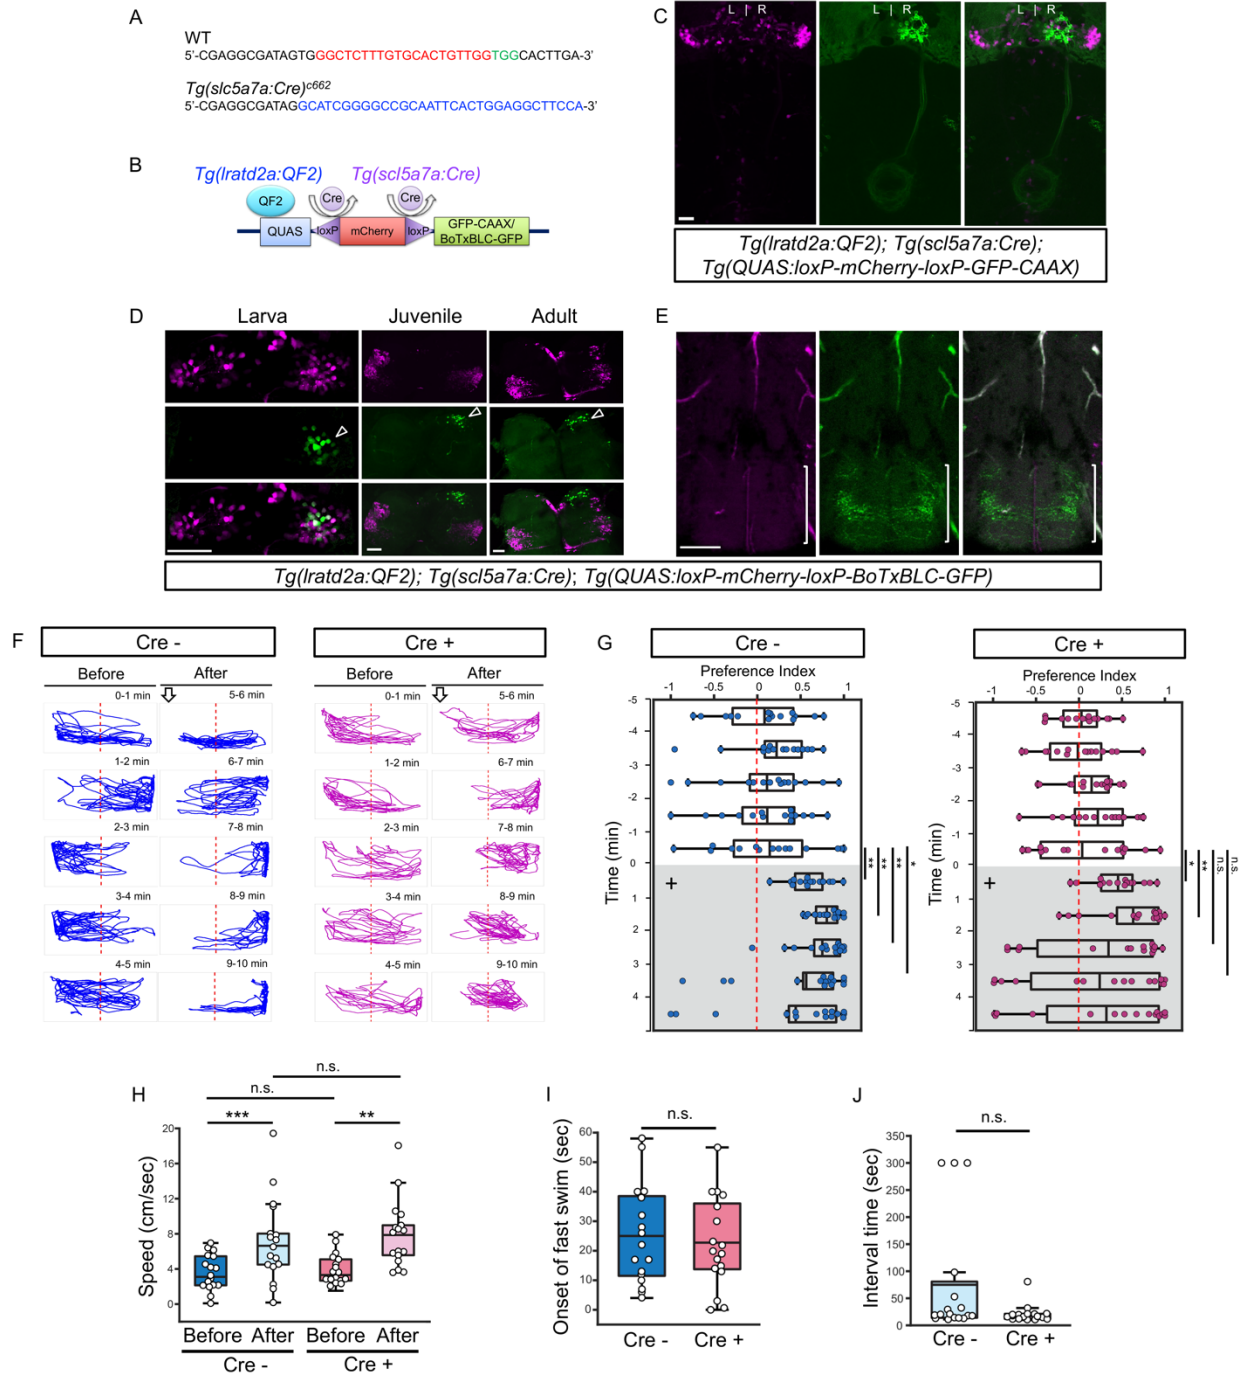

744

745 **Figure 3. Synaptic inhibition of *lratd2a* right dHb neurons attenuates response to cadaverine**

746 (A) Sequences upstream of the *slc5a7a* transcriptional start site before (WT) and after integration

747 of Cre (blue indicates donor DNA) at sgRNA target site (sgRNA binding site red and PAM

748 sequences green). (B) Schematic diagram of intersectional strategy using Cre/lox mediated

749 recombination and the QF2/QUAS binary system. QF2 is driven by *lratd2a* regulatory sequences  
750 and the *slc5a7a* promoter drives Cre leading to reporter/effector expression in *lratd2a* neurons in  
751 the right dHb. (C) Dorsal view of GFP labeling in only the right dHb after Cre-mediated  
752 recombination in a 5 dpf *Tg(lratd2a:QF2), Tg(slc5a7a:Cre), Tg(QUAS:loxP-mCherry-loxP-GFP-*  
753 *CAAX)* larva. Scale bar, 25  $\mu$ m. (D) *BoTxBLC-GFP* labeled cells (open arrowhead) in the right  
754 dHb in *Tg(lratd2a:QF2), Tg(slc5a7a:Cre), Tg(QUAS:loxP-mCherry-loxP-BoTxBLC-GFP)* 5 dpf,  
755 37 dpf and 4 mpf zebrafish. Upper images show mCherry labeled *lratd2a* Hb neurons, middle  
756 images show the subset of right dHb neurons that expressed Cre and switched to GFP, and the  
757 bottom row are merged images. Scale bar, 50  $\mu$ m. (E) Transverse section of *BoTxBLC-GFP*  
758 labeled axonal endings of dHb neurons that express Cre and *lratd2a* in a subregion of the vIPN  
759 (bracket) in 37 dpf *Tg(lratd2a:QF2), Tg(slc5a7a:Cre), Tg(QUAS:loxP-mCherry-loxP-BoTxBLC-*  
760 *GFP)* juveniles. Scale bar, 50  $\mu$ m. (F, G) Preferred tank location prior to and after cadaverine  
761 addition of adults genotyped for absence (Cre-, blue) or presence (Cre+, red) of *Tg(slc5a7a:Cre)*.  
762 (F) Representative 1 min traces for single Cre- and Cre+ adults recorded over 10 mins prior to  
763 (mins 0-5) and after (mins 6-10) addition of cadaverine to end of test tank (arrows). (G) Preference  
764 index for all adults tested 5 min prior to (white) and 5 min after (grey) addition of cadaverine (on  
765 + side). In Cre- fish, significant differences in avoidance behavior were detected after addition of  
766 cadaverine [6 min (P=0.0075), 7 min (P=0.0011), 8 min (P=0.0019), 9 min (P=0.032) compared  
767 to last min before addition, Student's t-test,  $n = 15$  fish]. Cre+ fish, showed no significant  
768 differences in their preferred location beyond two mins after cadaverine addition [6 min (P=0.012),  
769 7 min (P=0.0029) compared to last min before addition, Student's t-test,  $n = 15$  fish]. Dashed red  
770 lines in F and G denote midpoint of test tank. (H) Swimming speed (cm/sec) during 1 min before  
771 and after addition of alarm substance for Cre- [ $3.61 \pm 0.48$  and  $7.13 \pm 1.15$  , Student's t-test

772 (P=0.00097)], and Cre+ [4.02 ± 0.42 and 7.93 ± 0.92, Student's t-test (P=0.001)] adults. (I) Onset  
773 of fast swimming after application of alarm substance was observed at 25 ± 4.05 sec in Cre- and  
774 at 22.7 ± 3.72 sec in Cre+ fish. (J) Time interval between increased swimming speed and freezing  
775 behavior for Cre- (75 ± 26.53 sec) and for Cre+ (20.88 ± 3.93 sec). For H-J, numbers represent the  
776 mean ± SEM for *n* = 17 fish. \*P < 0.05; \*\*P < 0.01; \*\*\*P < 0.001; \*\*\*\*P < 0.0001; *n.s.*, not  
777 significant (P > 0.05).  
778

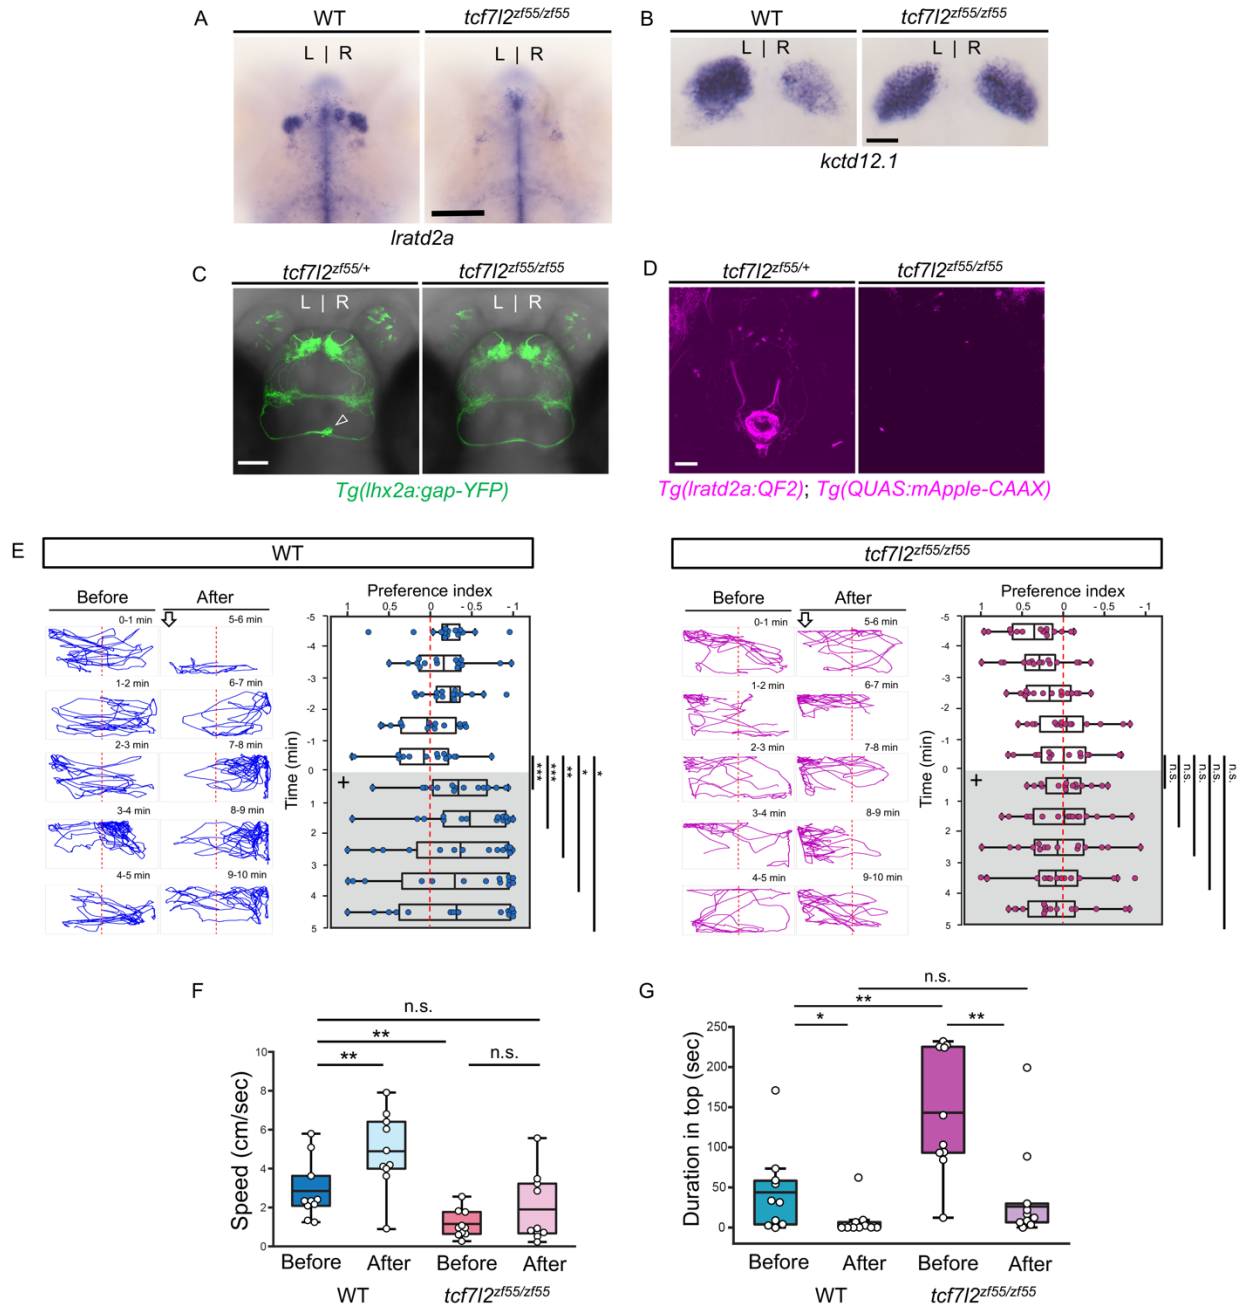

779

780 **Figure 4. Attenuated response to aversive odors in left-isomerized dHb mutants (A-B)**

781 (A) Absence of *lratd2a*-expressing right dHb neurons and (B) right-isomerized expression of

782 *kctd12.1* in *tcf7l2* mutant larvae at 5 dpf. (C) Dorsal views of olfactory mitral neuronal projections

783 of *Tg(lhx2a:gap-YFP)* larvae at 6 dpf. Open arrowhead indicates axon terminals of mitral cells in

784 the WT right dHb that are absent in the mutant. (D) Dorsal views of dHb neuronal projections to

785 the ventral IPN in *Tg(lratd2a:QF2)*, *Tg(QUAS:mApple-CAAX)* larvae at 6 dpf. (E) Representative  
786 traces (1 min) and preference index for *tcf7l2* mutant and WT sibling adults after addition of  
787 cadaverine (on + side). Only the WT siblings showed a significant difference in avoidance  
788 behavior for the 5 mins afterwards compared to the min before its addition [6 min (P=0.00035), 7  
789 min (P=0.000175), 8 min (P=0.0041), 9 min (P=0.0177), 10 min (P=0.0203),  $n = 15$  adults.  
790 Student's t-test]. (F) Swimming speed (cm/sec) for 30 sec before and after addition of alarm  
791 substance. For *tcf7l2* homozygotes,  $1.13 \pm 0.22$  cm/s and  $1.89 \pm 0.56$  cm/s [Student's t test (P =  
792 0.1011)] and for their WT siblings  $2.84 \pm 0.48$  cm/s and  $4.88 \pm 0.63$  cm/s [Student's t test  
793 (P=0.0026)],  $n = 10$  fish for each group (G) Duration in the upper half of the test tank prior to and  
794 after addition of alarm substance for *tcf7l2* adults was  $143.58 \pm 24.80$  sec and  $38.77 \pm 19.56$  sec  
795 (Mann-Whitney U=12; P=0.0047) and for their WT siblings was  $43.68 \pm 16.35$  sec and  $8.19 \pm 6.16$   
796 sec (Mann-Whitney U=20.5, P=0.0285),  $n = 10$  fish for each group. For F-G, numbers represent  
797 the mean  $\pm$  SEM. \* $P < 0.05$ ; \*\* $P < 0.01$ ; \*\*\* $P < 0.001$ ; *n.s.*, not significant (P > 0.05).  
798



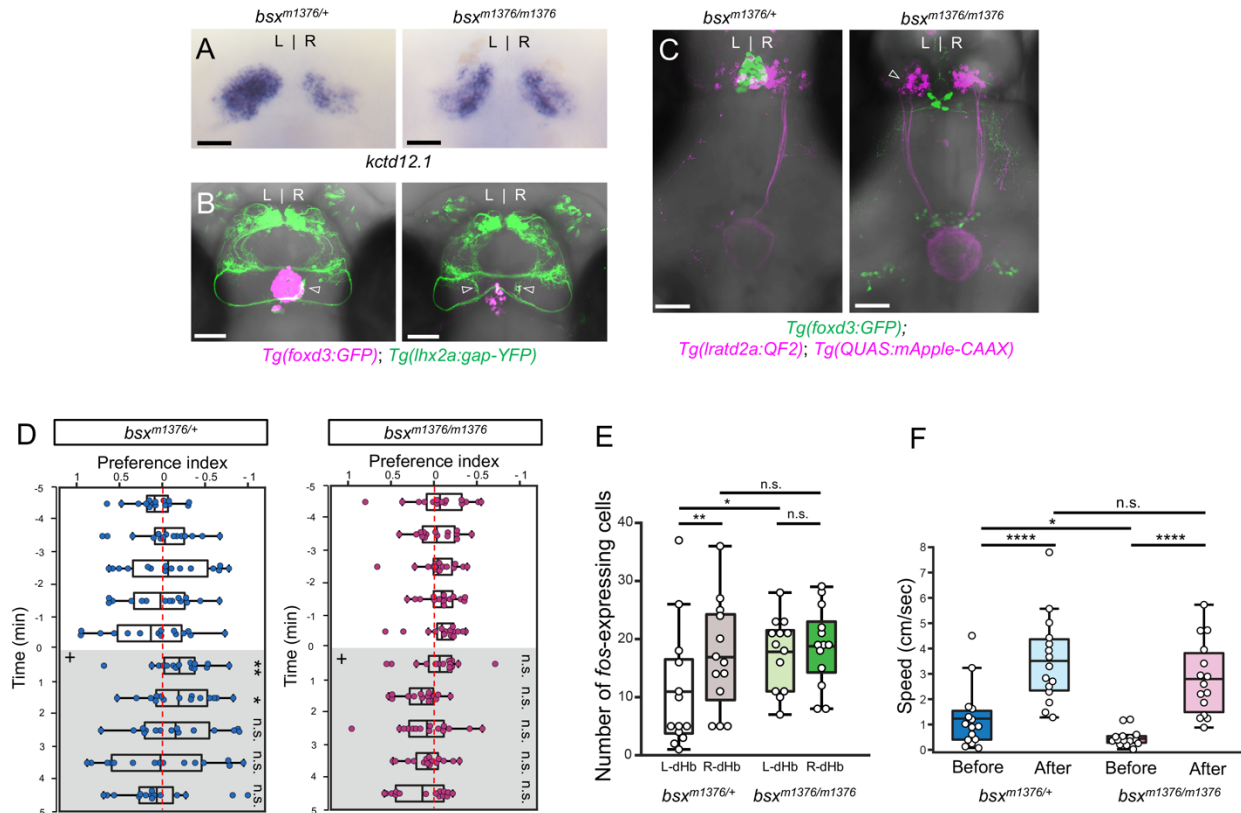

799

800 **Figure 5. Enhanced reactivity to alarm substance in mutants with right-isomerized dHb**

801 (A) Asymmetric expression of *kctd12.1* is right-isomerized in *bsx* homozygotes at 5 dpf. (B)

802 Projections of *Tg(lhx2a:gap-YFP)* labeled olfactory mitral cells terminate bilaterally (open

803 arrowheads) at *Iratd2a* neurons in *bsx<sup>m1376</sup>* homozygous mutants at 5 dpf. (C) In the mutants, axons

804 from both left (open arrowhead) and right dHb *Iratd2a* neurons project to the same region of the

805 vIPN. Scale bar, 50  $\mu$ m. (D) Preferred tank location of *bsx<sup>m1376</sup>* adults after addition of cadaverine

806 (on + side). Only the heterozygotes showed a significant difference in preference after application

807 of cadaverine compared to the min before its addition [6 min (Mann-Whitney  $U = 37$ ;  $P =$

808 0.00188), 7 min (Mann-Whitney  $U = 56$ ;  $P = 0.02034$ ).  $n = 15$  adults for each group]. (E)

809 Quantification of *fos*-expressing cells in the dHb after application of cadaverine in *bsx<sup>m1376/+</sup>* [11

810  $\pm 2.97$  cells on the left and  $16.84 \pm 2.62$  cells on the right. Student's t-test ( $P=0.006$ )] and

811 *bsx<sup>m1376/m1376</sup>* adults [ $17.61 \pm 1.72$  cells on the left and  $18.77 \pm 1.88$  cells on the right. Student's t-

812 test ( $P=0.645$ )], for  $n = 13$  sections from 7 adults for each group. (F) Swimming speed (cm/sec)  
813 for 30 sec before and after addition of alarm substance. In heterozygous adults, swimming speed  
814 was  $1.22 \pm 0.31$  cm/s before and  $3.52 \pm 0.44$  cm/s after [Student's t test ( $P=9.22089E-05$ )] and in  
815 homozygotes,  $0.46 \pm 0.08$  cm/s before and  $2.80 \pm 0.37$  cm/s after [Student's t test ( $P=1.38481E-$   
816  $05$ )],  $n = 15$  adults for each group. For E-F, numbers represent the mean  $\pm$  SEM.  $*P < 0.05$ ;  $**P$   
817  $< 0.01$ ;  $****P < 0.0001$ ; *n.s.*, not significant ( $P > 0.05$ ).
